# Supplementary material for: Food sovereignty at the organizational level: a framework for characterizing the diversity of economic actors
Source: Frontiers journal article supplement (doi:10.3389/fsufs.2025.1258633), 2025-05-12
Supplement: Data_Sheet_1.pdf [file Data_Sheet_1.pdf]

## *Supplementary material*

### **Food sovereignty at the organizational level: A framework for characterizing the diversity of economic actors**

#### **Overview:**

1. Literature sample
2. Main analytical questions of the theoretical thematic analysis
3. Table 6: Diversity of Economic Actors striving for Food Sovereignty (EAFS) identified from the literature sample

#### **1. Literature sample**

List of the 108 reviewed publications chosen for thematic analysis during the integrative literature review (in alphabetical order).

1. Abdoellah, Oekan S., Mindi Schneider, Luthfan Meilana Nugraha, Yusep Suparman, Cisma Tami Voletta, Susanti Withaningsih, Parikesit, Amanda Heptiyanggit, and Lukmanul Hakim. 2020. Homegarden commercialization: extent, household characteristics, and effect on food security and food sovereignty in Rural Indonesia. *Sustainability Science* 15 (3): 797–815. doi: 10.1007/s11625-020-00788-9.
2. Al Shamsi, Khalid Butti, Antonio Compagnoni, Giuseppe Timpanaro, Salvatore Cosentino, and Paolo Guarnaccia. 2018. A Sustainable Organic Production Model for “Food Sovereignty” in the United Arab Emirates and Sicily-Italy. *Sustainability* 10 (3): 620. doi: 10.3390/su10030620.
3. Alberio, Marco, and Melissa Moralli. 2021. Social innovation in alternative food networks. The role of co-producers in Campi Aperti. *Journal of Rural Studies* 82: 447–457. doi: 10.1016/j.jrurstud.2020.10.007.
4. Alkon, Alison Hope, and Teresa Marie Mares. 2012. Food sovereignty in US food movements: radical visions and neoliberal constraints. *Agriculture and Human Values* 29 (3): 347–359. doi: 10.1007/s10460-012-9356-z.
5. Anderson, Fergal. 2018. Food Sovereignty Now! A Guide to Food Sovereignty. Accessed 4 April 2020. <http://www.eurovia.org/wp-content/uploads/2018/01/FINAL-EN-FoodSov-A5-rev6.pdf>.
6. Ayres, Jeffrey, and Michael J. Bosia. 2011. Beyond Global Summitry: Food Sovereignty as Localized Resistance to Globalization. *Globalizations* 8 (1): 47–63. doi: 10.1080/14747731.2011.544203.
7. Badal, Marc, Rosa Binimelis, Gonzalo Gamboa, Maria Heras, and Gillem Tendero. 2011. Arran de terra. Indicadors participatius de Sobirania Alimentària a Catalunya. Barcelona. Accessed 4 April 2020. <https://www.entrepueblos.org/wp-content/uploads/1970/01/informeindicadorsba1-catalunya.pdf>.
8. Beingessner, Naomi, and Amber J. Fletcher. 2020. “Going local”: farmers’ perspectives on local food systems in rural Canada. *Agriculture and Human Values* 37 (1): 129–145. doi: 10.1007/s10460-019-09975-6.
9. Bhattacharya, Niloshree. 2017. Food sovereignty and agro-ecology in Karnataka: interplay of discourses, identities, and practices. *Development in Practice* 27 (4): 544–554. doi: 10.1080/09614524.2017.1305328.
10. Binimelis, Rosa, Marta Guadalupe Rivera-Ferre, Guillem Tendero, Marc Badal, María Heras, Gonzalo Gamboa, and Miquel Ortega. 2014. Adapting established instruments to build useful food sovereignty indicators. *Development Studies Research* 1 (1): 324–339. doi: 10.1080/21665095.2014.973527.

11. Blesh, Jennifer, and Hannah Wittman. 2015. "Brasilience:" Assessing Resilience in Land Reform Settlements in the Brazilian Cerrado. *Human Ecology* 43 (4): 531–546. doi: 10.1007/s10745-015-9770-0.
12. Blue, Sarah A., Amy Trauger, Hilda Kurtz, and Jason Dittmer. 2021. Food sovereignty and property in Cuba and the United States. *Journal of Peasant Studies*. doi: 10.1080/03066150.2021.1912026.
13. Borrás, Saturnino M., Jennifer C. Franco, and Sofía Monsalve Suárez. 2015. Land and food sovereignty. *Third World Quarterly* 36 (3): 600–617. doi: 10.1080/01436597.2015.1029225.
14. Calix de Dios, Hector, Heather Putnam, Santos Alvarado Dzul, Wendy Godek, Susanne Kissmann, Jean Luckson Pierre, and Steve Gliessman. 2014. The challenges of measuring food security and sovereignty in the Yucatán Peninsula. *Development in Practice* 24 (2): 199–215. doi: 10.1080/09614524.2014.884540.
15. Calvario, Rita, Annette Aurelie Desmarais, and Joseba Azkarraga. 2020. Solidarities from Below in the Making of Emancipatory Rural Politics: Insights from Food Sovereignty Struggles in the Basque Country. *Sociologia Ruralis* 60 (4): 857–879. doi: 10.1111/soru.12264.
16. Calvário, Rita. 2017. Food sovereignty and new peasantries: on re-peasantization and counter-hegemonic contestations in the Basque territory. *The Journal of Peasant Studies* 44 (2): 402–420. doi: 10.1080/03066150.2016.1259219.
17. Campbell, Brian C., and James R. Veteto. 2015. Free seeds and food sovereignty: anthropology and grassroots agrobiodiversity conservation strategies in the US South. *Journal of Political Ecology* 22: 445–465.
18. Carolan, Michael. 2018. "Smart" Farming Techniques as Political Ontology: Access, Sovereignty and the Performance of Neoliberal and Not-So-Neoliberal Worlds. *Sociologia Ruralis* 58 (4): 745–764. doi: 10.1111/soru.12202.
19. Claeys, Priscilla. 2012. The Creation of New Rights by the Food Sovereignty Movement: The Challenge of Institutionalizing Subversion. *Sociology-The Journal of the British Sociological Association* 46 (5): 844–860. doi: 10.1177/0038038512451534.
20. Clendenning, Jessica, Wolfram H. Dressler, and Carol Richards. 2016. Food justice or food sovereignty? Understanding the rise of urban food movements in the USA. *Agriculture and Human Values* 33 (1): 165–177. doi: 10.1007/s10460-015-9625-8.
21. Collins, Andrea M. 2019. Financialization, resistance, and the question of women's land rights. *International Feminist Journal of Politics* 21 (3): 454–476. doi: 10.1080/14616742.2018.1532805.
22. Courthryn, Christopher. 2018. Territories of peace: alter-territorialities in Colombia's San Jose de Apartado Peace Community. *Journal of Peasant Studies* 45 (7): 1432–1459. doi: 10.1080/03066150.2017.1312353.
23. Daye, Rebecca. 2020. Competing food sovereignties: GMO-free activism, democracy and state preemptive laws in Southern Oregon. *Agriculture and Human Values* 37 (4): 1013–1025. doi: 10.1007/s10460-020-10034-8.
24. De Marco Larrauri, Olga, David Perez Neira, and Marta Soler Montiel. 2016. Indicators for the Analysis of Peasant Women's Equity and Empowerment Situations in a Sustainability Framework: A Case Study of Cacao Production in Ecuador. *Sustainability* 8 (12). doi: 10.3390/su8121231.
25. UDeepak, Anne C. 2014. A Postcolonial Feminist Social Work Perspective on Global Food Insecurity. *Affilia-Journal of Women and Social Work* 29 (2): 153–164. doi: 10.1177/0886109913516456.
26. Dekeyser, Koen, Lise Korsten, and Lorenzo Fioramonti. 2018. Food sovereignty: shifting debates on democratic food governance. *Food Security* 10 (1): 223–233. doi: 10.1007/s12571-017-0763-2.
27. Desmarais, Annette Aurelie, and Hannah Wittman. 2014. Farmers, foodies and First Nations: getting to food sovereignty in Canada. *Journal of Peasant Studies* 41 (6): 1153–1173. doi: 10.1080/03066150.2013.876623.
28. Di Masso, Marina, Marta G. Rivera-Ferre, and Josep-Lluís Espluga. 2014. The Transformative Agrifood Movement in Catalonia: Operational Divergences in the Construction of Food

- Sovereignty. *Alternative Agrifood Movements: Patterns of Convergence and Divergence* 21: 159–181. doi: 10.1108/S1057-192220140000021002.
29. Di Masso, Marina, and Christos Zografos. 2015. Constructing food sovereignty in Catalonia: different narratives for transformative action. *Agriculture and Human Values* 32 (2): 183–198. doi: 10.1007/s10460-014-9528-0.
  30. Duncan, Jessica, and Stefano Pascucci. 2017. Mapping the Organisational Forms of Networks of Alternative Food Networks: Implications for Transition. *Sociologia Ruralis* 57 (3): 316–339. doi: 10.1111/soru.12167.
  31. Dunford, Robin. 2015. Human rights and collective emancipation: The politics of food sovereignty. *Review of International Studies* 41 (2): 239–261. doi: 10.1017/S0260210514000187.
  32. Ertor-Akyazi, Pinar. 2020. Contesting growth in marine capture fisheries: the case of small-scale fishing cooperatives in Istanbul. *Sustainability Science* 15 (1): 45–62. doi: 10.1007/s11625-019-00748-y.
  33. Fairbairn, Madeleine. 2012. Framing transformation: the counter-hegemonic potential of food sovereignty in the US context. *Agriculture and Human Values* 29 (2): 217–230. doi: 10.1007/s10460-011-9334-x.
  34. Figueroa, Meleiza. 2015. Food Sovereignty in Everyday Life: Toward a People-centered Approach to Food Systems. *Globalizations* 12 (4): 498–512. doi: 10.1080/14747731.2015.1005966.
  35. First Nations Development Institute. 2014. *Food Sovereignty Assessment Tool*. (2nd ed.). Longmont, Colorado.
  36. Fladvad, Benno, Silja Klepp, and Florian Duenckmann. 2020. Struggling against land loss: Environmental (in)justice and the geography of emerging rights. *Geoforum* 117: 80–89. doi: 10.1016/j.geoforum.2020.09.007.
  37. Gallegos-Riofrio, Carlos Andres, William F. Waters, Amaya Carrasco, Luis A. Riofrio, Mabel Pintag, Martha Caranqui, Joaquin Caranqui, Autumn Asher BlackDeer, and Lora L. Lannotti. 2021. Calia: An Indigenous Community in Ecuador Offers Lessons on Food Sovereignty and Sustainable Diets. *Current Developments in Nutrition* 5: 61–73. doi: 10.1093/cdn/nzab009.
  38. Garcia-Sempere, Ana, Moises Hidalgo, Helda Morales, Bruce G. Ferguson, Austreberta Nazar-Beutelspacher, and Peter Rosset. 2018. Urban transition toward food sovereignty. *Globalizations* 15 (3): 390–406. doi: 10.1080/14747731.2018.1424285.
  39. Garcia-Sempere, Ana, Helda Morales, Moises Hidalgo, Bruce G. Ferguson, Peter Rosset, and Austreberta Nazar-Beutelspacher. 2019. Food Sovereignty in the city?: A methodological proposal for evaluating food sovereignty in urban settings. *Agroecology and Sustainable Food Systems* 43 (10): 1145–1173. doi: 10.1080/21683565.2019.1578719.
  40. Gliessman, Steve, Harriet Friedmann, and Philip H. Howard. 2019. Agroecology and Food Sovereignty. *Ids Bulletin-Institute of Development Studies* 50 (2): 91–109. doi: 10.19088/1968-2019.120.
  41. Gordon, Rhyall. 2016. Radical Openings: Hegemony and the Everyday Politics of Community Economies. *Rethinking Marxism-A Journal of Economics Culture & Society* 28 (1): 73–90. doi: 10.1080/08935696.2015.1123007.
  42. Gupta, Clare. 2015. Return to Freedom: Anti-GMO Aloha 'Aina Activism on Molokai as an Expression of Place-based Food Sovereignty. *Globalizations* 12 (4): 529–544. doi: 10.1080/14747731.2014.957586.
  43. Hoey, Lesli, and Allison Sponseller. 2018. “It’s hard to be strategic when your hair is on fire”: alternative food movement leaders’ motivation and capacity to act. *Agriculture and Human Values* 35 (3): 595–609. doi: 10.1007/s10460-018-9850-z.
  44. Holt Giménez, Eric, and Annie Shattuck. 2011. Food crises, food regimes and food movements: rumblings of reform or tides of transformation? *The Journal of Peasant Studies* 38 (1): 109–144. doi: 10.1080/03066150.2010.538578.
  45. Iles, Alastair, and Maywa Montenegro de Wit. 2015. Sovereignty at What Scale? An Inquiry into Multiple Dimensions of Food Sovereignty. *Globalizations* 12 (4): 481–497. doi: 10.1080/14747731.2014.957587.

46. James, Dana, Evan Bowness, Tabitha Robin, Angela McIntyre, Colin Dring, Annette Desmarais, and Hannah Wittman. 2021. Dismantling and rebuilding the food system after COVID-19: Ten principles for redistribution and regeneration. *Journal of Agriculture Food Systems and Community Development* 10 (2): 29–51. doi: 10.5304/jafscd.2021.102.019.
47. Jawtusich, Julia, Christian Schader, Matthias Stolze, Lukas Baumgart, and Urs Niggli. 2013. Sustainability Monitoring and Assessment Routine: Sustainability Monitoring and Assessment Routine: Results from pilot applications of the FAO SAFA Guidelines. Conference Paper: International Symposium on Mediterranean Organic Agriculture and Quality Signs Related to the Origin (Agadir, Morocco, 2-4 December 2013). Réseau – Echanges- Développement Durable (REDD), Lausanne, Switzerland.
48. Kato, Yuki. 2013. Not Just the Price of Food: Challenges of an Urban Agriculture Organization in Engaging Local Residents. *Sociological Inquiry* 83 (3): 369–391. doi: 10.1111/soin.12008.
49. Kerr, Rachel Bezner. 2013. Seed struggles and food sovereignty in northern Malawi. *Journal of Peasant Studies* 40 (5): 867–897. doi: 10.1080/03066150.2013.848428.
50. Keske, Catherine. 2021. Boreal Agriculture Cannot Be Sustainable Without Food Sovereignty. *Frontiers in Sustainable Food Systems* 5. doi: 10.3389/fsufs.2021.673675.
51. Koenlsler, Alexander. 2020. Prefigurative Politics in Practice. Concrete Utopias in Italy's Food Sovereignty Activism. *Mobilization* 25 (1): 133–150. doi: 10.17813/1086-671-25-1-133.
52. Korsunsky, Alex. 2020. Back to the Root? Immigrant Farmers, Ethnographic Romanticism, and Untangling Food Sovereignty in Western Oregon. *Culture Agriculture Food and Environment* 42 (2): 114–124. doi: 10.1111/cuag.12258.
53. Laidlaw, Julia, and Liam Magee. 2016. Towards urban food sovereignty: the trials and tribulations of community-based aquaponics enterprises in Milwaukee and Melbourne. *Local Environment* 21 (5): 573–590. doi: 10.1080/13549839.2014.986716.
54. Larder, Nicolette, Kristen Lyons, and Geoff Woolcock. 2014. Enacting food sovereignty: values and meanings in the act of domestic food production in urban Australia. *Local Environment* 19 (1): 56–76. doi: 10.1080/13549839.2012.716409.
55. Leitgeb, Friedrich, Sarah Schneider, and Christian R. Vogl. 2016. Increasing food sovereignty with urban agriculture in Cuba. *Agriculture and Human Values* 33 (2): 415–426. doi: 10.1007/s10460-015-9616-9.
56. Levkoe, Charles Z., and Alison Blay-Palmer. 2018. Food Counts: Food systems report cards, food sovereignty and the politics of indicators. *Canadian Food Studies / La Revue canadienne des études sur l'alimentation* 5 (3): 49–75. doi: 10.15353/cfs-rcea.v5i3.277.
57. Levkoe, Charles Z., Jessica McLaughlin, and Courtney Strutt. 2021. Mobilizing Networks and Relationships Through Indigenous Food Sovereignty: The Indigenous Food Circle's Response to the COVID-19 Pandemic in Northwestern Ontario. *Frontiers in Communication* 6. doi: 10.3389/fcomm.2021.672458.
58. Loyer, Jessica, and Christine Knight. 2018. Selling the "Inca superfood": nutritional primitivism in superfoods books and maca marketing. *Food Culture & Society* 21 (4): 449–467. doi: 10.1080/15528014.2018.1480645.
59. Lubbock, Rowan. 2020. The hidden edifice of (food) sovereignty: Rights, territory, and the struggle for agrarian reform in Venezuela. *Journal of Agrarian Change* 20 (2): 289–310. doi: 10.1111/joac.12347.
60. Lutz, Juliana, and Judith Schachinger. 2013. Do Local Food Networks Foster Socio-Ecological Transitions towards Food Sovereignty? Learning from Real Place Experiences. *Sustainability* 5 (11): 4778–4796. doi: 10.3390/su5114778.
61. Machín, Odalys Labrador, Yamira Mirabal Gonzalez, and Carlos Cesar Torres Paez. 2020. Potential of agro livestock cooperatives in terms of food sovereignty and nutritional education. *Revista Cooperativismo Y Desarrollo-Coodes* 8 (3): 587–602.
62. Madsen, Sidney. 2021. Farm-level pathways to food security: beyond missing markets and irrational peasants. *Agriculture and Human Values*. doi: 10.1007/s10460-021-10234-w.

63. Matacena, Raffaele, and Paolo Corvo. 2020. Practices of Food Sovereignty in Italy and England: Short Food Supply Chains and the Promise of De-Commodification. *Sociologia Ruralis* 60 (2): 414–437. doi: 10.1111/soru.12283.
64. McClintock, Nathan, and Michael Simpson. 2018. Stacking functions: identifying motivational frames guiding urban agriculture organizations and businesses in the United States and Canada. *Agriculture and Human Values* 35 (1): 19–39. doi: 10.1007/s10460-017-9784-x.
65. McCune, Nils, and Marlen Sanchez. 2019. Teaching the territory: agroecological pedagogy and popular movements. *Agriculture and Human Values* 36 (3): 595–610. doi: 10.1007/s10460-018-9853-9.
66. Mihesuah, Devon. 2017. Searching for Haknip Achukma (Good Health): Challenges to Food Sovereignty Initiatives in Oklahoma. *American Indian Culture and Research Journal* 41 (3): 9–30. doi: 10.17953/aicrj.41.3.mihesua.
67. Mills, Elyse N. 2018. Implicating 'fisheries justice' movements in food and climate politics. *Third World Quarterly* 39 (7): 1270–1289. doi: 10.1080/01436597.2017.1416288.
68. Moragues-Faus, Ana. 2016. Emancipatory or Neoliberal Food Politics? Exploring the "Politics of Collectivity" of Buying Groups in the Search for Egalitarian Food Democracies. *Antipode* 49 (2): 455–476. doi: 10.1111/anti.12274.
69. Moragues-Faus, Ana, and Terry Marsden. 2017. The political ecology of food: Carving 'spaces of possibility' in a new research agenda. *Journal of Rural Studies* 55: 275–288. doi: 10.1016/j.jrurstud.2017.08.016.
70. Moreno-Calles, Isabel Ana, Alejandro Casas, Alexis Daniela Rivero-Romero, Yessica Angelica Romero-Bautista, Selene Rangel-Landa, Roberto Alexander Fisher-Ortiz, Fernando Alvarado-Ramos, Mariana Vallejo-Ramos, and Didac Santos-Fita. 2016. Ethnoagroforestry: integration of biocultural diversity for food sovereignty in Mexico. *Journal of Ethnobiology and Ethnomedicine* 12. doi: 10.1186/s13002-016-0127-6.
71. Naylor, Lindsay. 2019. Food sovereignty in place: Cuba and Spain. *Agriculture and Human Values* 36 (4): 705–717. doi: 10.1007/s10460-019-09938-x.
72. Noll, Samantha, and Esme G. Murdock. 2020. Whose Justice is it Anyway? Mitigating the Tensions Between Food Security and Food Sovereignty. *Journal of Agricultural & Environmental Ethics* 33 (1): 1–14. doi: 10.1007/s10806-019-09809-9.
73. Ortega-Cerdà, Miquel, and Marta G. Rivera-Ferre. 2010. Indicadores internacionales de Soberanía Alimentaria.: Nuevas herramientas para una nueva agricultura. *Revista Iberoamericana* (14): 53–77.
74. Oteros-Rozas, Elisa, Adriana Ruiz-Almeida, Mateo Aguado, Jose A. Gonzalez, and Marta G. Rivera-Ferre. 2019. A social-ecological analysis of the global agrifood system. *Proceedings of the National Academy of Sciences of the United States of America* 116 (52): 26465–26473. doi: 10.1073/pnas.1912710116.
75. Paddock, Jessica, and Alastair Michael Smith. 2018. What role for trade in food sovereignty? Insights from a small island archipelago. *Journal of Peasant Studies* 45 (2): 368–388. doi: 10.1080/03066150.2016.1260553.
76. Pahnke, Anthony. 2021. The Revolutionary Potential of Food Sovereignty: Applying Lenin's Insights on Dialectics, the State, and Political Action. *Rethinking Marxism* 33 (3): 378–395. doi: 10.1080/08935696.2021.1935551.
77. Pimbert, Michel P. 2018. Food sovereignty and the regeneration of terraced landscapes. *Annales-Anali Za Istrske in Mediteranske Studije-Series Historia Et Sociologia* 28 (4): 779–794. doi: 10.19233/ASHS.2018.47.
78. Plahe, Jagjit, Sarah Wright, and Miriam Marembo. 2017. Livelihoods Crises in Vidarbha, India: Food Sovereignty through Traditional Farming Systems as a Possible Solution. *South Asia-Journal of South Asian Studies* 40 (3): 600–618. doi: 10.1080/00856401.2017.1339581.
79. Pollans, Margot J. 2018. Food Systems. *Climate Change, Public Health, and the Law*: 266–299.
80. Porcuna-Ferrer, Anna, Valentin Fiala, Bernhard Freyer, Jacob van Etten, Ronnie Vernooy, and Lorenz Probst. 2020. Do community seed banks contribute to the social-ecological resilience of

- communities? A case-study from Western Guatemala. *International Journal of Agricultural Sustainability* 18 (3): 232–249. doi: 10.1080/14735903.2020.1747199.
81. Portman, Anne. 2018. Food Sovereignty and Gender Justice. *Journal of Agricultural & Environmental Ethics* 31 (4): 455–466. doi: 10.1007/s10806-018-9739-2.
  82. Powell, Lisa Jordan, and Hannah Wittman. 2018. Farm to school in British Columbia: mobilizing food literacy for food sovereignty. *Agriculture and Human Values* 35 (1): 193–206. doi: 10.1007/s10460-017-9815-7.
  83. Pye, Oliver. 2021. Agrarian Marxism and the proletariat: a palm oil manifesto. *Journal of Peasant Studies* 48 (4): 807–826. doi: 10.1080/03066150.2019.1667772.
  84. Reardon, Simón, Juan Alberto Pérez, and Reinaldo Alemán. 2010. Agroecology and the Development of Indicators of Food Sovereignty in Cuban Food Systems. *Journal of Sustainable Agriculture* 34 (8): 907–922. doi: 10.1080/10440046.2010.519205.
  85. Resler, Megan L., and Sophia E. Hagolani-Albov. 2021. Augmenting agroecological urbanism: the intersection of food sovereignty and food democracy. *Agroecology and Sustainable Food Systems* 45 (3): 320–343. doi: 10.1080/21683565.2020.1811829.
  86. Robinson, Danielle. 2021. Rural Food and Wine Tourism in Canada's South Okanagan Valley: Transformations for Food Sovereignty? *Sustainability* 13 (4). doi: 10.3390/su13041808.
  87. Roman-Alcalá, Antonio. 2015. Broadening the Land Question in Food Sovereignty to Northern Settings: A Case Study of Occupy the Farm. *Globalizations* 12 (4): 545–558. doi: 10.1080/14747731.2015.1033199.
  88. Ruiz-Almeida, Adriana, and Marta G. Rivera-Ferre. 2019. Internationally-based indicators to measure Agri-food systems sustainability using food sovereignty as a conceptual framework. *Food Security* 11 (6): 1321–1337. doi: 10.1007/s12571-019-00964-5.
  89. Santafe-Troncoso, Veronica, and Philip A. Loring. 2021. Indigenous food sovereignty and tourism: the Chakra Route in the Amazon region of Ecuador. *Journal of Sustainable Tourism* 29 (2-3): 391–410. doi: 10.1080/09669582.2020.1770769.
  90. Schiavoni, Christina M. 2016. The contested terrain of food sovereignty construction: toward a historical, relational and interactive approach. *Journal of Peasant Studies* 44 (1): 1–32. doi: 10.1080/03066150.2016.1234455.
  91. Schiavoni, Christina M., Salena Tramel, Hannah Twomey, and Benedict S. Mongula. 2018. Analysing agricultural investment from the realities of small-scale food providers: grounding the debates. *Third World Quarterly* 39 (7): 1348–1366. doi: 10.1080/01436597.2018.1460198.
  92. Scialabba, Nadia. 2014. SAFA guidelines. Sustainability assessment of food and agriculture systems, 3rd edn. Rome: Food and Agriculture Organization of the United Nations.
  93. Seminar, Annisa Utami, Sarwititi Sarwoprasodjo, Rilus Kinseng, and Dwi Santosa. 2018. Peasant Understanding of Food Sovereignty: Indonesian Peasants in a Transnational Agrarian Movement. *Makara Hubs-Asia* 22 (2): 129–142. doi: 10.7454/hubs.asia.1250918.
  94. Shattuck, Annie, Christina M. Schiavoni, and Zoe VanGelder. 2015. Translating the Politics of Food Sovereignty: Digging into Contradictions, Uncovering New Dimensions. *Globalizations* 12 (4): 421–433. doi: 10.1080/14747731.2015.1041243.
  95. Siegner, Alana Bowen, Charisma Acey, and Jennifer Sowerwine. 2020. Producing urban agroecology in the East Bay: from soil health to community empowerment. *Agroecology and Sustainable Food Systems* 44 (5): 566–593. doi: 10.1080/21683565.2019.1690615.
  96. Sippel, Sarah Ruth, and Nicolette Larder. 2021. Bridging divides: constructing food sovereignty in Australia. *The Journal of Peasant Studies* 48 (2): 368–386. doi: 10.1080/03066150.2019.1655638.
  97. Sonnino, Roberta, Terry Marsden, and Ana Moragues-Faus. 2016. Relationalities and convergences in food security narratives: towards a place-based approach. *Transactions of the Institute of British Geographers* 41 (4): 477–489. doi: 10.1111/tran.12137.
  98. Soper, Rachel. 2020. From protecting peasant livelihoods to essentializing peasant agriculture: problematic trends in food sovereignty discourse. *Journal of Peasant Studies* 47 (2): 265–285. doi: 10.1080/03066150.2018.1543274.r

99. Stapleton, Sarah Riggs. 2019. Parent activists versus the corporation: a fight for school food sovereignty. *Agriculture and Human Values* 36 (4): 805–817. doi: 10.1007/s10460-019-09955-w.
100. Sunam, Ramesh, and Jagannath Adhikari. 2016. How does Transnational Labour Migration Shape Food Security and Food Sovereignty? Evidence from Nepal. *Anthropological Forum* 26 (3): 248–261. doi: 10.1080/00664677.2016.1197819.
101. Taylor, Dorceta E. 2018. Black Farmers in the USA and Michigan: Longevity, Empowerment, and Food Sovereignty. *Journal of African American Studies* 22 (1): 49–76. doi: 10.1007/s12111-018-9394-8.
102. Thiemann, Louis, and Antonio Roman-Alcalá. 2019. Fast Food Sovereignty: Contradiction in Terms or Logical Next Step? *Journal of Agricultural and Environmental Ethics* 32 (5-6): 813–834. doi: 10.1007/s10806-019-09800-4.
103. Tramel, Salena. 2018. Convergence as political strategy: social justice movements, natural resources and climate change. *Third World Quarterly* 39 (7): 1290–1307. doi: 10.1080/01436597.2018.1460196.
104. Turner, Katherine L., C. Julián Idrobo, Annette Aurélie Desmarais, and Ana Maria Peredo. 2020. Food sovereignty, gender and everyday practice: the role of Afro-Colombian women in sustaining localised food systems. *The Journal of Peasant Studies*: 1–27. doi: 10.1080/03066150.2020.1786812.
105. Vallejo-Rojas, Virginia, Federica Ravera, and Marta G. Rivera-Ferre. 2016. Developing an integrated framework to assess agri-food systems and its application in the Ecuadorian Andes. *Regional Environmental Change* 16 (8): 2171–2185. doi: 10.1007/s10113-015-0887-x.
106. van der Ploeg, Jan Douwe. 2020. From biomedical to politico-economic crisis: the food system in times of Covid-19. *Journal of Peasant Studies* 47 (5): 944–972. doi: 10.1080/03066150.2020.1794843.
107. Villalba-Eguiluz, Unai, Asier Arcos-Alonso, Perez de Mendiguren, Juan Carlos, and Leticia Urretabizkaia. 2020. Social and Solidarity Economy in Ecuador: Fostering an Alternative Development Model? *Sustainability* 12 (17). doi: 10.3390/su12176876.
108. Wittman, Hannah, Jessica Dennis, and Heather Pritchard. 2017. Beyond the market? New agrarianism and cooperative farmland access in North America. *Journal of Rural Studies* 53: 303–316. doi: 10.1016/j.jrurstud.2017.03.007.

## 2. Main analytical questions of the thematic analysis

For the thematic analysis (outlined in chapter 3.3), we used analytic questions starting from the two overarching research questions (see chapter 1). These are:

- 1 Which patterns regarding EAFS can be identified in the food sovereignty literature?
- 2 How can the diversity of EAFS be conceptualized?

The aim of the study was to extract the data aligned with the research questions and the Conceptual and theoretical background (organizational perspectives see chapter 2) for an understanding of how the topic under research (conceptualization of EAFS; term definition, see chapter 1) has evolved in the food sovereignty literature (literature data sample see chapter 3.2). Starting from the two overarching research questions, the main analytical questions during the thematic analysis are:

What do the food sovereignty data sample reveal about

- individual organizations (along the agri-food supply chain) which are engaged in economic activity (e.g., CSA),
- individual actors which are engaged in economic activity,
- examples that are covered by the understanding of EAFS,
- existing self-definitions and/or understandings of food sovereignty by the identified individual organizations and individual actors,
- used and cited food sovereignty definitions,
- food sovereignty practices,
- production related patterns (along the agri-food supply chain (e.g. processing, processors, CSA),
- organization(al) related patterns,
- food sovereignty generation,
- food sovereignty frameworks with links to the above questions/aspects,
- food sovereignty indicators with links to the above questions/aspects?



### 3. Table S6: Diversity of Economic Actors striving for Food Sovereignty (EAFS) identified from the literature sample

TABLE S6 Diversity of Economic Actors striving for Food Sovereignty (EAFS) identified from the literature sample

The diversity of EAFS was identified from the literature sample. Economic actors are grouped along the agri-food supply chain (grouping and illustration by the authors).

| <b>Agri-food supply chain view with various positions, stages, and sectors:</b> | <b>Identified EAFS (selection).</b><br><br><b>This includes both individual organizations engaged in economic activity and their individual actors (organizational members including founders, organizers, workers, volunteers, etc.)</b>                                                    | <b>Mentioned in the following references from the literature sample (selection):</b>                                                                                                                                                           |
|---------------------------------------------------------------------------------|----------------------------------------------------------------------------------------------------------------------------------------------------------------------------------------------------------------------------------------------------------------------------------------------|------------------------------------------------------------------------------------------------------------------------------------------------------------------------------------------------------------------------------------------------|
| <b>Pre-production activities and agricultural inputs sector</b>                 | Producers, manufactures, agricultural supply stores, agricultural input stores, agro-input stores and service providers for credit, implements, tractors, manure and compost fertilizers, fuel, digital technology.                                                                          | e.g., Ortega-Cerdà and Rivera-Ferre 2010; Badal et al. 2011; Kerr 2013; Calix de Dios et al. 2014; First Nations Development Institute 2014; Pimbert 2018; Carolan 2018; Pollans 2018; Ruiz-Almeida and Rivera-Ferre 2019; Soper 2020.         |
|                                                                                 | Seed and seedlings production, peasant own-seed production, on-farm seed production, seed storage and treatment, open source licenses for seed development.                                                                                                                                  | e.g., Kerr 2013; Binimelis et al. 2014; Dekeyser et al. 2018; Porcuna-Ferrer et al 2019.                                                                                                                                                       |
|                                                                                 | Providing land by land cooperatives and land trust organizations.                                                                                                                                                                                                                            | e.g., Wittman et al. 2017.                                                                                                                                                                                                                     |
| <b>Primary production sector</b>                                                | Primary production and small-scale producers, especially peasants as key players of a first food sovereignty generation with different types of farming, fishing and livestock keeping.                                                                                                      | e.g., Dunford 2015; Borras et al. 2015; Dekeyser et al. 2018; Soper 2020.                                                                                                                                                                      |
|                                                                                 | Peasants, peasant farmers, peasant farms, peasant agriculture, peasant producers, peasant-driven agriculture, poor peasants, rich peasants.                                                                                                                                                  | e.g., Figueroa 2015; Pimbert 2018; Calvário et al. 2019; Paddock and Smith 2017; Soper 2019; Gliessman et al. 2019; Thiemann and Roman-Alcalá 2019; Madsen 2021; van der Ploeg 2021; Seminar et al. 2018; Borras et al. 2015.                  |
|                                                                                 | Farms, small farmers, smallholder farmers, local farmers, part-time farmers.                                                                                                                                                                                                                 | e.g., Ayres and Bosia 2011; Fairbairn 2011; Kerr 2013; Borras et al. 2015; Blesh and Wittman 2015; Beingassner and Fletcher 2019; Gliessman et al. 2019; Naylor 2019; Blue et al. 2021.                                                        |
|                                                                                 | Family farm, family farms, family farming, family-farmer driven agriculture.                                                                                                                                                                                                                 | e.g., Fairbairn 2011; Blesh and Wittman 2015; Pimbert 2018; Thiemann and Roman-Alcalá 2019; Gliessman et al. 2019; Sippel and Larder 2019.                                                                                                     |
|                                                                                 | Immigrant farmers.                                                                                                                                                                                                                                                                           | e.g., Alkon and Mares 2012; Korsunsky 2020.                                                                                                                                                                                                    |
|                                                                                 | Indigenous peasants, indigenous peasant producers, indigenous peasants producer cooperative.                                                                                                                                                                                                 | e.g., Soper 2019.                                                                                                                                                                                                                              |
|                                                                                 | Black farming, black farmers, black urban farmers, black family farms, black farming communities.                                                                                                                                                                                            | e.g., Alkon and Mares 2011; Figueroa 2015; Taylor 2018.                                                                                                                                                                                        |
|                                                                                 | Urban farmers, black urban farmers, urban farming, urban agriculture, urban agricultural practitioners; urban agriculture organization, urban agriculture organizations and businesses, community-supported agriculture (CSA) urban farm, CSA urban farm organization.                       | e.g., Reardon and Pérez 2010; Kato 2013; Clendenning et al. 2015; Leitgeb et al. 2015; Hoey and Sponseller 2018; McClintock 2018; Powell and Wittman 2018; Taylor 2018; Resler and Hagolani-Albov 2019 ; Sieger et al. 2019.                   |
|                                                                                 | Urban gardens, urban gardeners, community gardens, urban community gardens, homegardens, guerilla gardening, community and school gardens and backyard food, food gardening in practices (urban, peri-urban, rural).                                                                         | e.g., Alkon and Mares 2011; First Nations Development Institute 2014; Borras et al. 2015; Desmarais and Wittman 2015 ; Garcia-Sempere et al. 2018; Naylor 2019; Resler and Hagolani-Albov 2019; Abdoellah et al. 2020; Sippel and Larder 2021. |
|                                                                                 | Small- to medium, small- to medium-scale, small and medium-sized farms, small- and medium-scale farmers, small-to-medium-sized farms, small-to-medium-size family farms, small and medium-sized producers, small and medium scale abattoirs and processors, small-scale, small-scale peasant | e.g., Lutz and Schachinger 2013; Desmarais and Wittman 2015 ; Roman-Alcalá 2015; Calvário 2017; Powell and Wittman 2018; Pimbert 2018; Taylor 2018; Lubbock 2019; Pye 2019; James et al. 2021.                                                 |

|                                                                    |                                                                                                                                                                                                                                                                                                                     |                                                                                                                                                                                                                                                                                                                                                                                                                 |
|--------------------------------------------------------------------|---------------------------------------------------------------------------------------------------------------------------------------------------------------------------------------------------------------------------------------------------------------------------------------------------------------------|-----------------------------------------------------------------------------------------------------------------------------------------------------------------------------------------------------------------------------------------------------------------------------------------------------------------------------------------------------------------------------------------------------------------|
|                                                                    | agriculture, peasant, family, and collective production.                                                                                                                                                                                                                                                            |                                                                                                                                                                                                                                                                                                                                                                                                                 |
|                                                                    | Agroecological producers; producers using agroecological production practices, diversified agroecological system, agroecological model, agroecological production models.                                                                                                                                           | e.g., Blesh_Wittman_2015; Vallejo-Rojas et al. 2016; Calvário 2017; Dekeyser et al. 2018; Garcia-Sempere_Garcia_Sempere_et al 2018; Gliessman et al. 2019.                                                                                                                                                                                                                                                      |
|                                                                    | Organic farming, organic practices, organic products.                                                                                                                                                                                                                                                               | e.g., Lutz and Schachinger 2013; Di Masso et al. 2014; Gordon 2016; Al Shamsi et al. 2018; Alberio and Moralli 2021; Levkoe and Blay-Palmer 2018.                                                                                                                                                                                                                                                               |
| <b>Other producers</b>                                             | Peasants and farmers various work roles such as preparation of agricultural inputs, food processing, post-harvesting, and distribution.                                                                                                                                                                             | e.g., Seminar et al. 2018; Pye 2021.                                                                                                                                                                                                                                                                                                                                                                            |
|                                                                    | Food producers, small producers, food and small and marginal producers, marginalized small-scale producers, small-scale producers, domestic producers, local producers, greater producer autonomy, diverse food providers.                                                                                          | e.g., Fairbairn 2012; Desmarais and Wittman 2014; Larder et al. 2014; Borrás et al. 2015; Dunford 2015; Plahe et al. 2017; Anderson 2018; Dekeyser et al. 2018; Pimbert 2018; Portman 2018; Powell and Wittman 2018; Tramel 2018; Naylor 2019; Ruiz-Almeida and Rivera-Ferre 2019; Blue et al. 2021.                                                                                                            |
|                                                                    | Food businesses, small-scale food businesses, worker-owned food businesses, organic food businesses, food businesses that implement sustainable sourcing and/or fair remuneration.                                                                                                                                  | e.g., First Nations Development Institute 2014; Pimbert 2018; Thiemann and Roman-Alcalá 2019; Koenlsler 2020.                                                                                                                                                                                                                                                                                                   |
|                                                                    | Small food enterprises, local food enterprises. Local food entrepreneurs, cooperative food enterprises, peasants network with small or mid-sized food enterprises to distribute products.                                                                                                                           | e.g., Alkon and Mares 2012; First Nations Development Institute 2014; Clendenning et al. 2016; Pimbert 2018; Seminar et al. 2018.                                                                                                                                                                                                                                                                               |
| <b>Postproduction activities with need for food infrastructure</b> | Food infrastructure, local food infrastructure, aggregation hubs and distribution infrastructure; Connection, flows, and links of goods and services (e.g., purchase, transport, processing, storage, cooling, related equipment) between producing farms and final consumption.                                    | e.g., Lutz and Schachinger 2013; Binimelis et al. 2014; Desmarais and Wittman 2014; Campbell and Veteto 2015; Leitgeb et al. 2016; Sonnino et al. 2016; Levkoe and Blay-Palmer 2018; Pollans 2018; Schiavoni et al. 2018; Seminar et al. 2018; Thiemann and Roman-Alcalá 2019; Siegner et al. 2020; van der Ploeg 2020; Keske 2021; Levkoe et al. 2021.                                                         |
| <b>Food processing</b>                                             | Food processors, food processing facilities, food processing, processed food, local food processing, local processing, locally-based food processing facilities, less industrialized food processing chains, seafood processing, local processed food, 'food sovereign' channels of food processing.                | e.g., Fairbairn 2012; Kato 2013; First Nations Development Institute 2014; Larder et al. 2014; Borrás et al. 2015; Schiavoni 2016; Pollans 2018; Courtheyn 2018; Hoey and Sponseller 2018; Anderson 2018; Levkoe and Blay-Palmer 2018; Paddock and Smith 2018; Pimbert 2018; Garcia-Sempere et al. 2019; Thiemann and Roman-Alcalá 2019; Ertor-Akyazi 2020; Matacena and Corvo 2020; Keske 2021; Robinson 2021. |
|                                                                    | Small-scale processors, small-scale food processors, small-scale processing, small scale food supply and processing, small food processing laboratories, small regional processors, decentralized processing, re-establish small- and medium-scale abattoirs and processors.                                        | e.g., Lutz and Schachinger 2013; Hoey and Sponseller 2018; Garcia-Sempere et al. 2019; Beingessner and Fletcher 2020; Koenlsler 2020; James et al. 2021.                                                                                                                                                                                                                                                        |
|                                                                    | Abattoirs, re-establish small- and medium-scale abattoir, culturally appropriate butcher shop, meat processing, slaughterhouses.                                                                                                                                                                                    | e.g., Levkoe and Blay-Palmer 2018; van der Ploeg 2020; James et al. 2021.                                                                                                                                                                                                                                                                                                                                       |
|                                                                    | Mill, businesses milling flour.                                                                                                                                                                                                                                                                                     | e.g., Levkoe and Blay-Palmer 2018                                                                                                                                                                                                                                                                                                                                                                               |
| <b>Distribution</b>                                                | Distribution, food distribution, food distributor, distributor, distributors, local distribution, different modes of distribution, means of distribution, decentralized distribution, 'food sovereign' channels of food distribution, distribution of resources, critique of existing systems of food distribution. | e.g., Kato 2013; First Nations Development Institute 2014; Larder et al. 2014; Borrás et al. 2015; Plahe et al. 2017; Anderson 2018; Dekeyser et al. 2018; Pollans 2018; Courtheyn 2018; Hoey and Sponseller 2018; Taylor 2018; Garcia-Sempere et al. 2019; Thiemann and Roman-Alcalá 2019; Beingessner and Fletcher 2020; Matacena and Corvo 2020; Blue et al. 2021; Sippel and Larder 2021.                   |
|                                                                    | Farmers' markets, local farmers markets, black farmers' markets.                                                                                                                                                                                                                                                    | e.g., Holt Giménez and Shattuck 2011; Alkon and Mares 2012; Fairbairn 2012; Larder et al. 2014; Clendenning et al. 2016; Pollans 2018; Taylor 2018.                                                                                                                                                                                                                                                             |
|                                                                    | Direct producer–consumer markets and other direct trade links such as food co-ops, food co-op, community-run co-ops, collective-purchasing groups, purchasing groups, collectively purchasing direct                                                                                                                | e.g., Lutz and Schachinger 2013; First Nations Development Institute 2014; Borrás et al. 2015; Hoey and Sponseller 2018; Garcia-Sempere et al. 2018; Thiemann and                                                                                                                                                                                                                                               |

|                                          |                                                                                                                                                                                                                                                                                                                                                                                                                    |                                                                                                                                                                                                                                                                                                                                                                                                                   |
|------------------------------------------|--------------------------------------------------------------------------------------------------------------------------------------------------------------------------------------------------------------------------------------------------------------------------------------------------------------------------------------------------------------------------------------------------------------------|-------------------------------------------------------------------------------------------------------------------------------------------------------------------------------------------------------------------------------------------------------------------------------------------------------------------------------------------------------------------------------------------------------------------|
|                                          | from the farmers, and other organizations of consumers (see also AFNs); bypassing merchants, peddlers and vendors to promote direct producer–consumer markets.                                                                                                                                                                                                                                                     | Roman-Alcalá 2019; Maticena and Corvo 2020.                                                                                                                                                                                                                                                                                                                                                                       |
| <b>Retail</b>                            | Wholesalers, supermarkets, local commerce and supermarkets, family-run stores, small family stores, grocery stores, cooperative-supermarket, cooperatively owned grocery stores, community-led grocery stores, local stores, food store keepers, health food shops and supermarkets, farmers store.                                                                                                                | e.g., Alkon and Mares 2012; Lutz and Schachinger 2013; First Nations Development Institute 2014; Borrás et al. 2015; Clendenning et al. 2016; Calvário 2017; García-Sempere et al. 2018; Loyer and Knight 2018; Paddock and Smith 2018; Thiemann and Roman-Alcalá 2019; Beingessner and Fletcher 2020; Alberio and Moralli 2021.                                                                                  |
| <b>Cross-sector forms / interactions</b> | Alternative food networks (AFNs) – see also local food networks, CSA, food hubs etc. In addition, see the conceptualization of civic food networks (CFNs) by Renting et al. (2012).                                                                                                                                                                                                                                | e.g., Di Masso and Zografos 2015; Moragues-Faus 2016; Moragues-Faus and Marsden 2017; Maticena and Corvo 2020; Blue et al. 2021.                                                                                                                                                                                                                                                                                  |
|                                          | Community-supported agriculture (CSA), CSA model, CSA farm, CSA initiatives, CSAs, local CSA farm, local marketing arrangements like CSA, direct producer–consumer markets and other forms of CSA, forms of CSAs, food sovereignty 'from below' by reinforcing the link with consumers through CSA.                                                                                                                | e.g., Ayres and Bosia 2011; Holt Giménez and Shattuck 2011; Alkon and Mares 2012; Claeys 2012; Fairbairn 2012; Lutz and Schachinger 2013; Larder et al. 2014; Borrás et al. 2015; Wittman et al. 2017; García-Sempere et al. 2018; Levkoe and Blay-Palmer 2018; Pimbert 2018; Gliessman et al. 2019; Naylor 2019; Stapleton 2019; Beingessner and Fletcher 2020; Maticena and Corvo 2020; Sippel and Larder 2021. |
|                                          | Short food-supply chains                                                                                                                                                                                                                                                                                                                                                                                           | e.g., Al Shamsi et al. 2018; Maticena and Corvo 2020; Alberio and Moralli 2021.                                                                                                                                                                                                                                                                                                                                   |
|                                          | Food hub, food hub models, local food hubs, regional food hubs, regional distribution infrastructure such as food hubs, food hub.                                                                                                                                                                                                                                                                                  | e.g., Lutz and Schachinger 2013; Figueroa 2015; Laidlaw and Magee 2016; Moragues-Faus and Marsden 2017; Hoey and Sponseller 2018; Levkoe and Blay-Palmer 2018; Pollans 2018; Siegner et al. 2020.                                                                                                                                                                                                                 |
| <b>Vertical forms</b>                    | Active vertical network building by food initiatives, construction of (vertical) cooperatives, vertical enterprises to build their own (black) agri-food supply chains, other (black) supply chain organizations.                                                                                                                                                                                                  | e.g., Sonnino et al. 2016; Taylor 2018; van der Ploeg 2020.                                                                                                                                                                                                                                                                                                                                                       |
|                                          | Cooperation, networks, alliances across the supply chain as between producers, processors, and consumers; networks involving farmers, retailers, consumers, and food processors; new alliances that can be developed between producers and consumers in new rural-urban alliances.                                                                                                                                 | e.g., Lutz and Schachinger 2013; Borrás et al. 2015; Figueroa 2015; Moragues-Faus 2016; Dekeyser et al. 2018; Pollans 2018; García-Sempere et al. 2019; Beingessner and Fletcher 2020; Maticena and Corvo 2020.                                                                                                                                                                                                   |
| <b>Out-of-home consumption</b>           | Restaurants, local restaurants, non-fast food restaurants, community-supported restaurant, participating restaurants, restaurant with direct producers/sales, supplying nearby restaurants, intermediate buyers such as small restaurants and catering businesses, canteens, schools, public schools, farm to school movement, farm-to-school programs, farm to school non-profit organization, farm-to-cafeteria. | e.g., Ayres and Bosia 2011; Alkon and Mares 2012; Fairbairn 2012; First Nations Development Institute 2014; Clendenning et al. 2016; Al Shamsi et al. 2018; McClintock and Simpson 2018; Powell and Wittman 2018; Taylor 2018; Stapleton 2019; Thiemann and Roman-Alcalá 2019; Beingessner and Fletcher 2020; van der Ploeg 2020.                                                                                 |
